# Supplementary material for: Oral microbial community typing of caries and pigment in primary dentition
Source: PubMed Central journal article supplement (PMC4974685; doi:10.1186/s12864-016-2891-z), 2016-08-05

Additional file 2: Figure S2

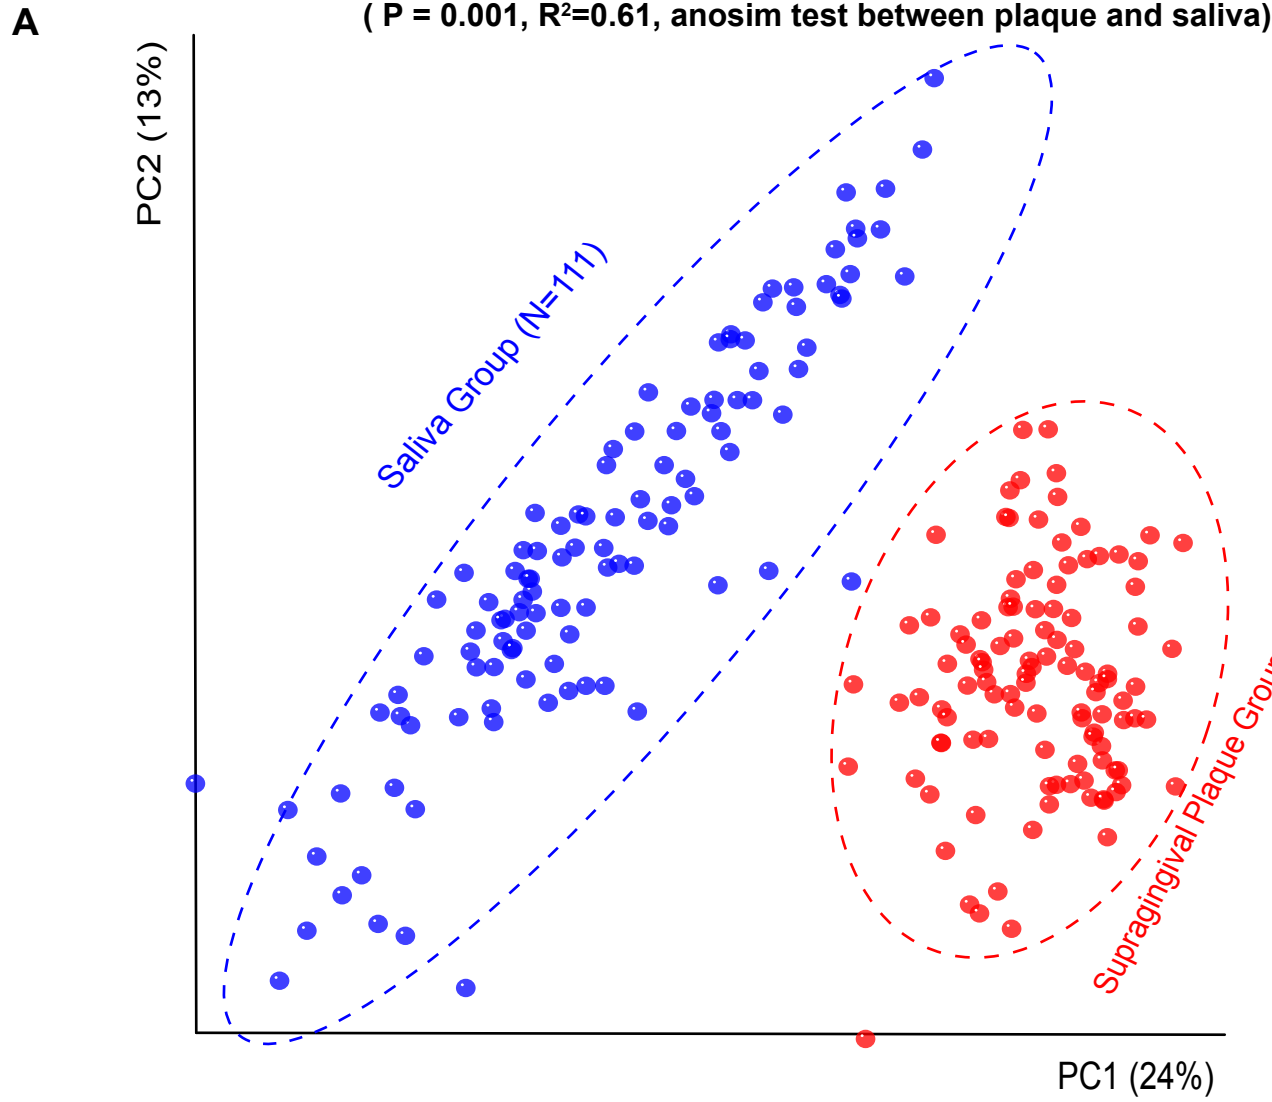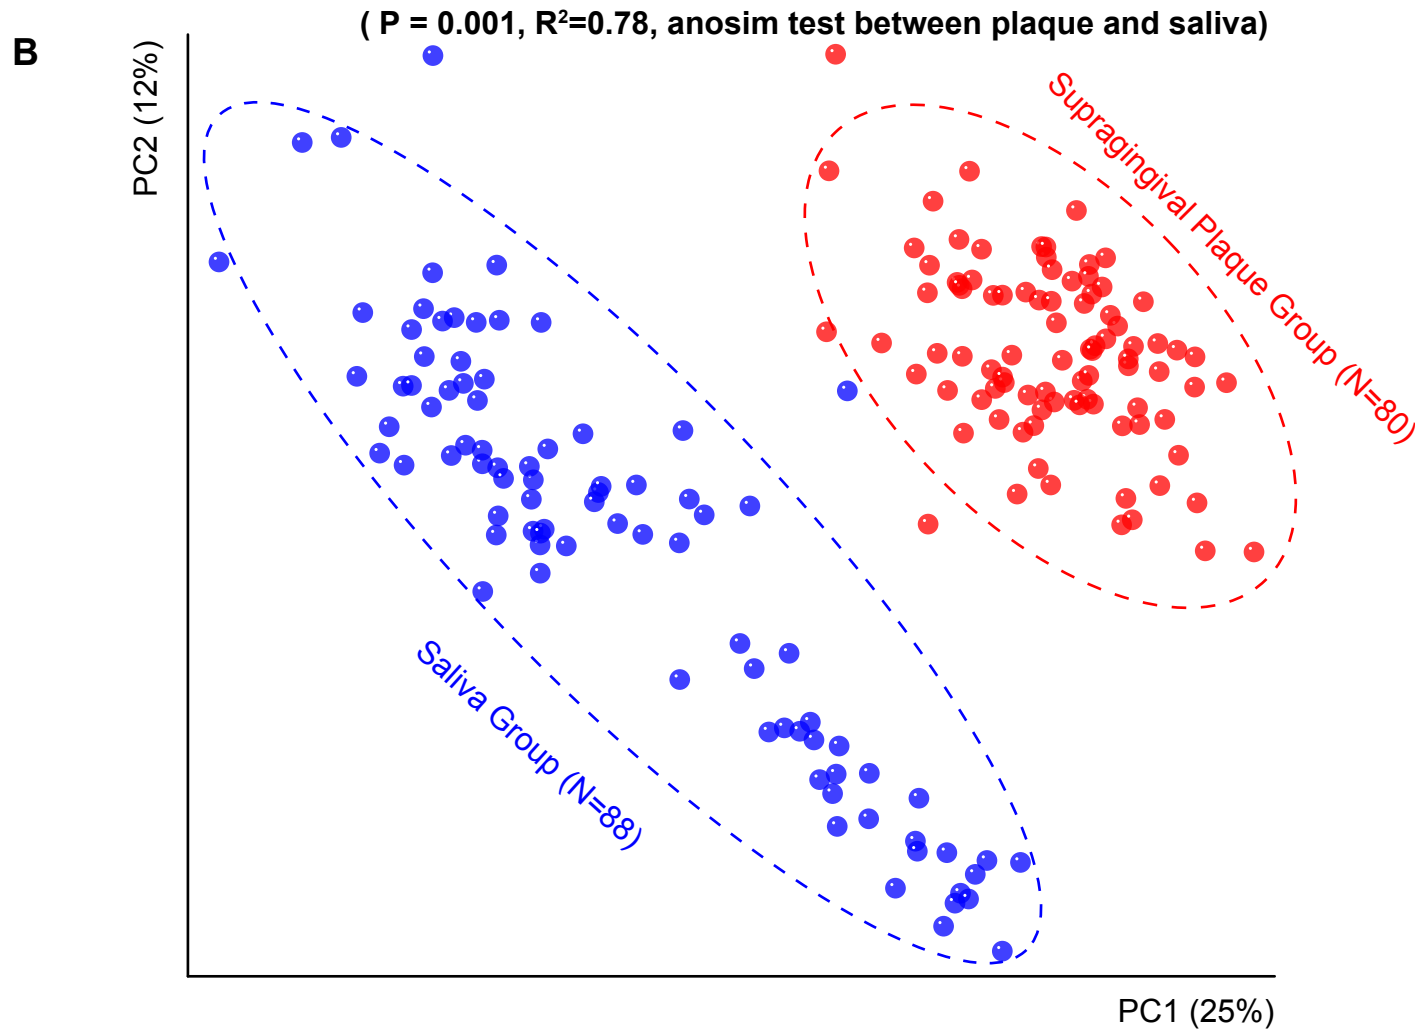

Supplement: 12864_2016_2891_MOESM2_ESM.pdf [file 12864_2016_2891_MOESM2_ESM.pdf]
